# Supplementary material for: Study of the Suitability of a Personal Exposure Monitor to Assess Air Quality
Source: MDPI journal article supplement (doi:10.3390/atmos15030315), 2024-03-02
Supplement: s1 [file s1]

# Study of the Suitability of a Personal Exposure Monitor to Assess Air Quality

Halah E. Aljofi <sup>1,\*</sup>, Thomas J. Bannan <sup>2,\*</sup>, Michael Flynn <sup>2</sup>, James Evans <sup>2</sup>, David Topping <sup>2</sup>, Emily Matthews <sup>2</sup>, Sebastian Diez <sup>3,4</sup>, Pete Edwards <sup>4</sup>, Hugh Coe <sup>2,5</sup>, Daniel R. Brison <sup>6,7</sup>, Martie van Tongeren <sup>8</sup>, Edward D. Johnstone <sup>7</sup> and Andrew Povey <sup>8</sup>

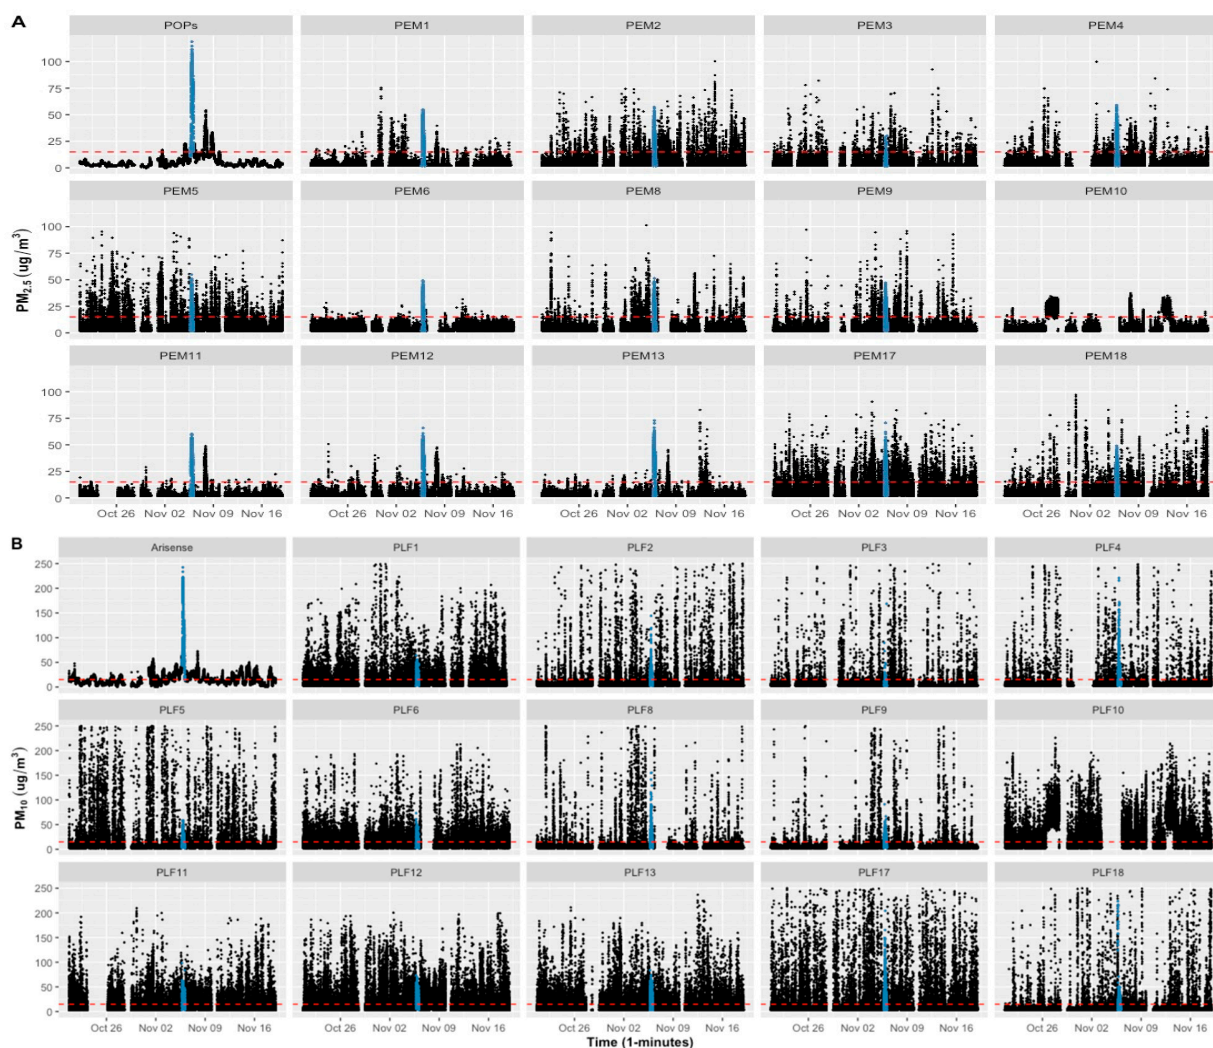

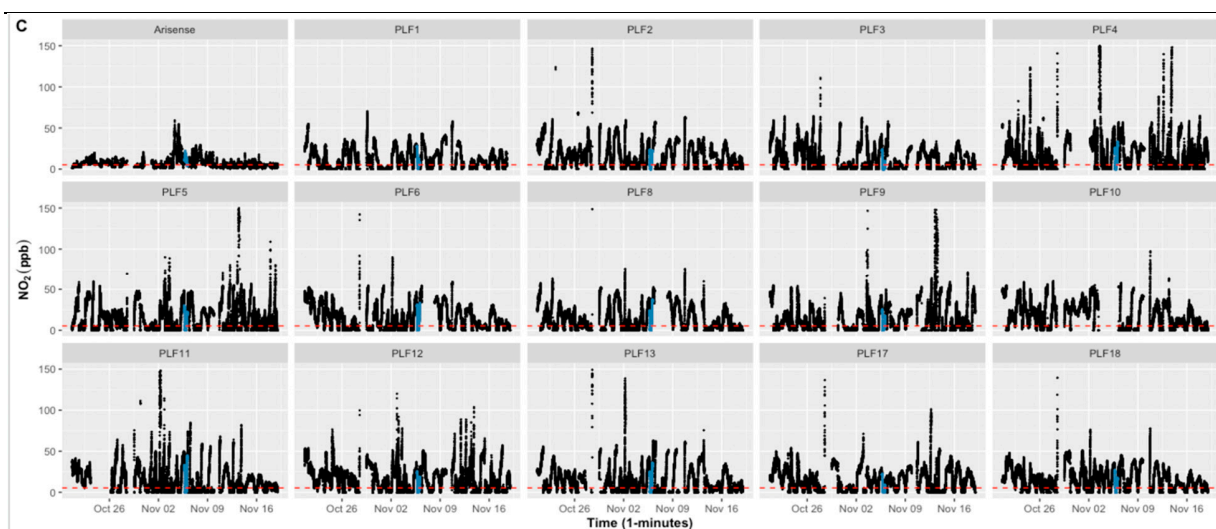

--- : the red dash line represents the WHO limited value ( $45 \mu\text{g}/\text{m}^3$  for 24-hr mean  $\text{PM}_{10}$ ), ( $15 \mu\text{g}/\text{m}^3$  for 24-hr mean  $\text{PM}_{2.5}$ ), ( $25 \mu\text{g}/\text{m}^3$  ( $13.3 \text{ ppb}$ ) for 24-hr mean  $\text{NO}_2$ ). The bonfire event colored with a blue line.

**Figure S1.** Time series of POPS and ARISense devices (references) and PLF tools for (a)  $\text{PM}_{2.5}$  (b)  $\text{PM}_{10}$ , and (c)  $\text{NO}_2$  concentrations carried out over three weeks periods at the indoor monitoring site.

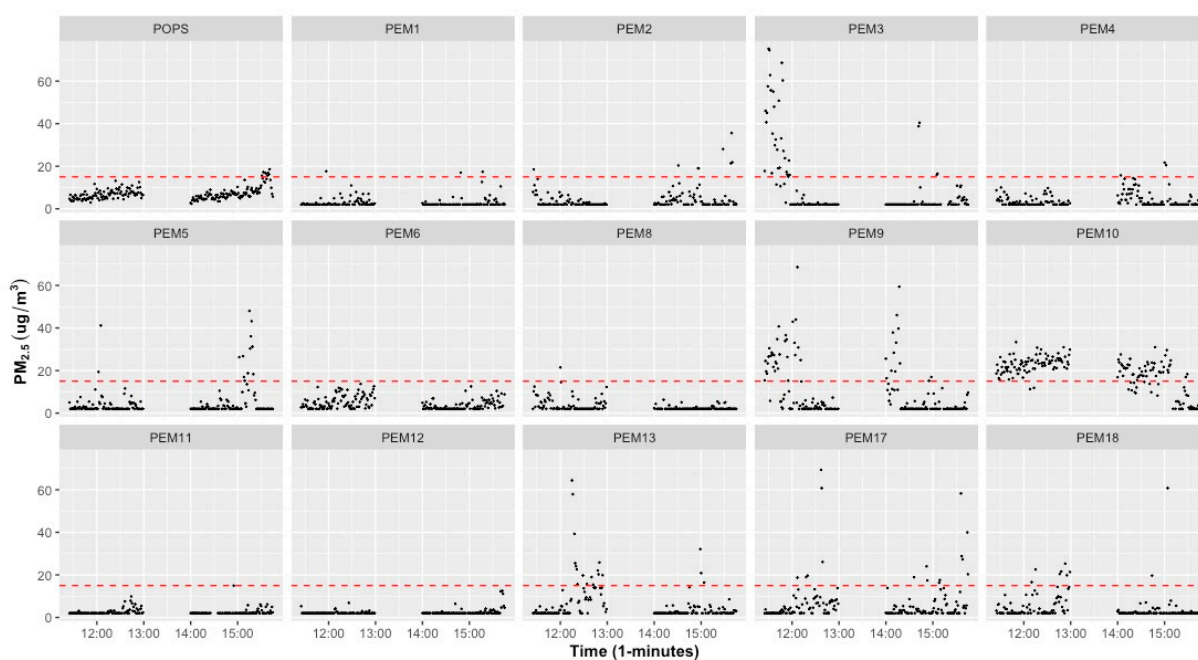

--- :the red dash line represents the WHO limited value ( $15 \mu\text{g}/\text{m}^3$  for 24-hr mean  $\text{PM}_{2.5}$ )

**Figure S2.** Time series of POPS device (reference) and PLF tools for  $\text{PM}_{2.5}$  concentrations carried out about three hours on road site.

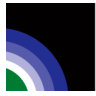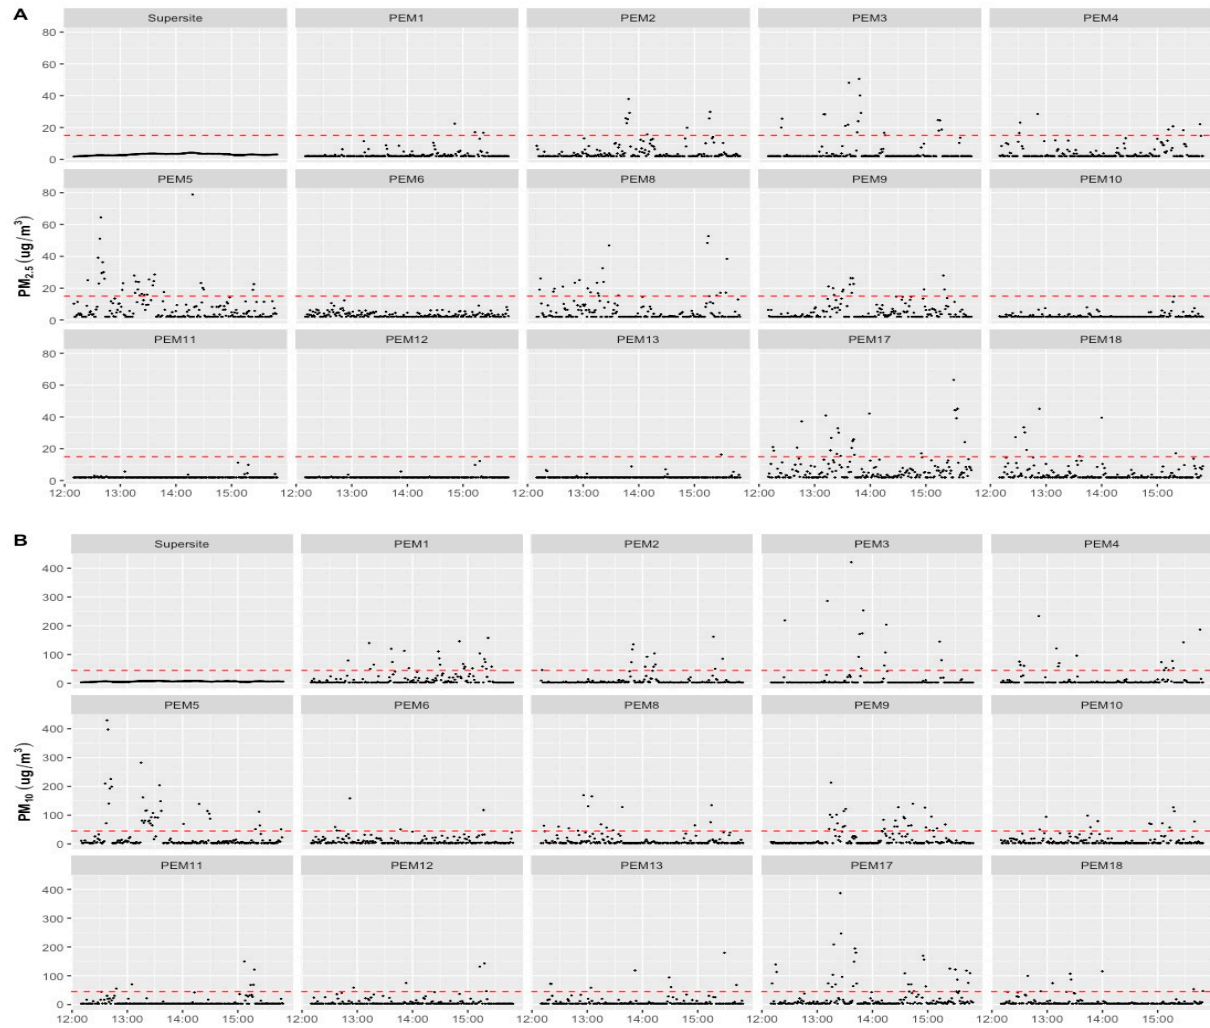

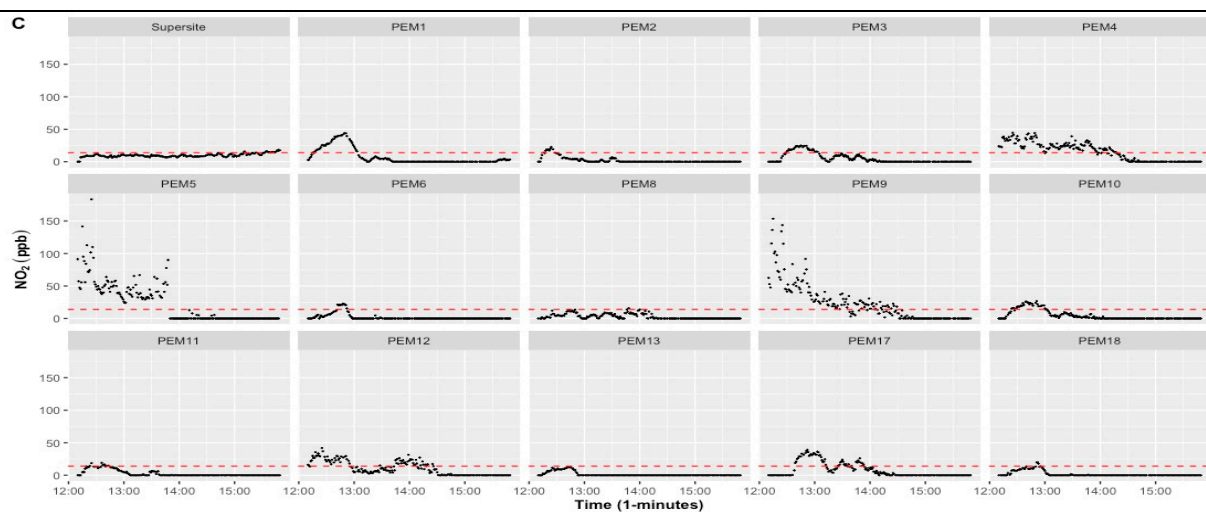

---- : the red dash line represents the WHO limited value ( $45 \mu\text{g}/\text{m}^3$  for 24-hr mean PM<sub>10</sub>), ( $15 \mu\text{g}/\text{m}^3$  for 24-hr mean PM<sub>2.5</sub>), ( $25 \mu\text{g}/\text{m}^3$  ( $13.3 \text{ ppb}$ ) for 24-hr mean NO<sub>2</sub>).

**Figure S3.** Time series of Supersite monitor (reference) and PLF tools for (a) PM<sub>2.5</sub>, (b) PM<sub>10</sub>, and (c) NO<sub>2</sub> concentrations carried out about three hours at the the Manchester Air Quality Supersite.

**Table S1.** Descriptive summary of PM<sub>2.5</sub>, PM<sub>10</sub>, NO<sub>2</sub> concentrations measured by the PLFs and the references: POPs and Arisense at the indoor monitoring.

| PM <sub>2.5</sub><br>(µg/m <sub>3</sub> ) | PO<br>PS      | PL<br>F 1 | PL<br>F 2 | PL<br>F 3 | PLF<br>4 | PL<br>F 5 | PL<br>F 6 | PL<br>F 8 | PL<br>F 9 | PLF<br>10 | PLF<br>11 | PLF<br>12 | PLF<br>13 | PLF<br>17 | PLF<br>18 | PLF<br>19 | PLF<br>20 | PLF<br>21 |
|-------------------------------------------|---------------|-----------|-----------|-----------|----------|-----------|-----------|-----------|-----------|-----------|-----------|-----------|-----------|-----------|-----------|-----------|-----------|-----------|
| Minimum                                   | 0.1           | 2         | 2         | 2         | 2        | 2         | 2         | 2         | 2         | 2         | 2         | 2         | 2         | 2         | 2         | 2         | 2         | 2         |
| 25th percentile                           | 2.23          | 2         | 2         | 2         | 2        | 2         | 2         | 2         | 2         | 2         | 2         | 2         | 2         | 2         | 2         | 2.59      | 2         | 2         |
| Median                                    | 3.78          | 2         | 2.09      | 2         | 2        | 3.2       | 3.02      | 2         | 2         | 2.11      | 2         | 2         | 2         | 4.32      | 2         | 5.17      | 2         | 2.01      |
| Mean                                      | 6.21          | 3.5       | 5.79      | 3.96      | 4.64     | 7.0       | 4.31      | 4.59      | 4.61      | 5.82      | 3.39      | 3.78      | 3.46      | 8.06      | 5.28      | 6.97      | 5.1       | 6.32      |
| 75th percentile                           | 6.5           | 2.7       | 5.37      | 3.22      | 4.28     | 8.0       | 5.54      | 3.83      | 3.94      | 4.66      | 2.23      | 2.86      | 2.33      | 9.72      | 4.66      | 8.79      | 4.96      | 6.06      |
| Maximum                                   | 118.7         | 75.38     | 100.4     | 92.64     | 99.81    | 95.3      | 49.17     | 101.3     | 97.13     | 37.42     | 60.18     | 65.76     | 82.82     | 90.48     | 97.04     | 68.14     | 102.33    | 92.81     |
| Total num. of data points                 | 36034         | 31725     | 33665     | 31474     | 31404    | 33572     | 31968     | 30898     | 32596     | 29973     | 30255     | 33775     | 32780     | 33692     | 33415     | 32702     | 27349     | 33338     |
| Missing records                           | 0             | 4309      | 2369      | 4560      | 4630     | 2462      | 4066      | 5136      | 3438      | 6061      | 5779      | 2259      | 3254      | 2342      | 2619      | 3332      | 8685      | 2696      |
| PM <sub>10</sub><br>(µg/m <sup>3</sup> )  | Ari-sens<br>e | PL<br>F 1 | PL<br>F 2 | PL<br>F 3 | PLF<br>4 | PL<br>F 5 | PL<br>F 6 | PL<br>F 8 | PL<br>F 9 | PLF<br>10 | PLF<br>11 | PLF<br>12 | PLF<br>13 | PLF<br>17 | PLF<br>18 | PLF<br>19 | PLF<br>20 | PLF<br>21 |
| Minimum                                   | 0.34          | 3         | 3         | 3         | 3        | 3         | 3         | 3         | 3         | 3         | 3         | 3         | 3         | 3         | 3         | 3         | 3         | 3         |
| 25th percentile                           | 7.8           | 3         | 3         | 3         | 3        | 3         | 3         | 3         | 3         | 3         | 3         | 3         | 3         | 3         | 3         | 14.3      | 3         | 3         |
| Median                                    | 13.2          | 3.1       | 3.08      | 3         | 3        | 4.2       | 7.44      | 3         | 3         | 10.9      | 4.98      | 7.68      | 3.35      | 5.7       | 3         | 28.4      | 3         | 3.23      |
| Mean                                      | 16.7          | 14.13     | 13.01     | 8.47      | 10.01    | 18.99     | 15.34     | 9.73      | 8.39      | 25.96     | 14.95     | 19.93     | 15.08     | 22.63     | 12.89     | 34.85     | 15.95     | 15.82     |
| 75th percentile                           | 21.2          | 14.22     | 6.6       | 4.27      | 5.67     | 9.82      | 19.8      | 4.94      | 4.92      | 37.83     | 19.34     | 27.52     | 16.85     | 15.4      | 5.92      | 47.41     | 7.24      | 8.09      |
| Maximum                                   | 242.5         | 489.4     | 691.8     | 840.7     | 808.9    | 712.7     | 212.7     | 644.4     | 816.5     | 225.8     | 209.4     | 200.13    | 658.22    | 790.56    | 782.17    | 210.04    | 668.85    | 666.92    |
| Total num. of data points                 | 13284         | 31725     | 33665     | 31474     | 31404    | 33572     | 31968     | 30898     | 32596     | 29973     | 30255     | 33775     | 32780     | 33692     | 33415     | 32702     | 27349     | 33338     |
| Missing records                           | 3099          | 4513      | 2498      | 4826      | 6229     | 2629      | 4316      | 5398      | 3659      | 6404      | 6068      | 2398      | 3466      | 2492      | 2787      | 3524      | 9185      | 2886      |

| <i>NO<sub>2</sub> (ppb)</i>      | Ari-<br>sens<br>e | PL<br>F 1 | PL<br>F 2 | PL<br>F 3 | PLF<br>4 | PL<br>F 5 | PL<br>F 6 | PL<br>F 8 | PL<br>F 9 | PLF<br>10 | PLF<br>11 | PLF<br>12 | PLF<br>13 | PLF<br>17 | PLF<br>18 | PLF<br>19 | PLF<br>20 | PLF<br>21 |
|----------------------------------|-------------------|-----------|-----------|-----------|----------|-----------|-----------|-----------|-----------|-----------|-----------|-----------|-----------|-----------|-----------|-----------|-----------|-----------|
| <i>Minimum</i>                   | 0.72              | 0         | 0         | 0         | 0        | 0         | 0         | 0         | 0         | 0         | 0         | 0         | 0         | 0         | 0         | 0         | 0         | 0         |
| <i>25th percentile</i>           | 3.16              | 1.4       | 2.62      | 0.22      | 3.31     | 1.9       | 2.72      | 1.74      | 1.36      | 5.7       | 1.98      | 4.3       | 1.29      | 3.9       | 6.19      | 3.02      | 2.02      | 3.63      |
| <i>Median</i>                    | 5.83              | 10.       | 13.6      | 8.91      | 14.2     | 11.       | 11        | 9.36      | 9.72      | 18.8      | 9.78      | 14.5      | 9.93      | 13.5      | 14.6      | 12.8      | 10.3      | 13.8      |
| <i>Mean</i>                      |                   | 32        | 2         |           | 3        | 18        |           |           |           | 7         |           | 6         |           | 3         | 9         | 8         | 7         | 5         |
| <i>75th percentile</i>           | 6.91              | 13.       | 16.2      | 13.1      | 21.0     | 16.       | 15.5      | 14.6      | 14.3      | 19.5      | 15.1      | 16.6      | 14.7      | 15.5      | 16.7      | 15.6      | 14.2      | 18.0      |
| <i>Maximum</i>                   |                   | 12        | 5         |           | 8        | 01        | 1         | 4         | 7         | 7         |           | 6         | 7         | 2         | 4         | 1         | 5         | 2         |
|                                  | 8.31              | 20.       | 26.8      | 22.1      | 30.7     | 24.       | 25.3      | 24.5      | 22.0      | 30.8      | 23.5      | 25.2      | 23.4      | 25.1      | 25.1      | 24.2      | 23.3      | 29.5      |
|                                  |                   | 84        | 6         | 3         | 9        | 94        | 2         | 9         | 2         | 2         | 6         | 4         | 4         | 7         | 5         | 3         | 5         | 2         |
|                                  | 59.1              | 256       | 463.      | 311.      | 517.     | 500       | 514.      | 257.      | 177.      | 556.      | 573.      | 151.      | 206.      | 250.      | 181.      | 654.      | 218.      | 222.      |
| <i>Total num. of data points</i> | 3                 | .7        | 0         | 2         | 9        | .5        | 2         | 3         | 9         | 69        | 64        | 84        | 63        | 52        | 71        | 85        | 33        | 83        |
|                                  | 353               | 311       | 330       | 309       | 308      | 32957     | 315       | 305       | 320       | 2962      | 2964      | 3317      | 3217      | 3307      | 3279      | 3216      | 2697      | 3267      |
|                                  | 39                | 91        | 47        | 11        | 04       |           | 20        | 12        | 03        | 4         | 0         | 2         | 8         | 7         | 9         | 2         | 8         | 2         |
| <i>Missing records</i>           | 315               | 442       | 249       | 474       | 619      | 259       | 406       | 509       | 360       | 6097      | 6051      | 2356      | 3426      | 2461      | 2758      | 3418      | 8858      | 2856      |
|                                  | 3                 | 3         | 0         | 1         | 1        | 7         | 2         | 3         | 5         |           |           |           |           |           |           |           |           |           |

**Table S2.** Descriptive summary of PM<sub>2.5</sub> levels measured by the PLFs and POPS at the road site.

| PM <sub>2.5</sub><br>(µg/m <sub>3</sub> ) | POP<br>S | PL<br>F 1 | PL<br>F 2 | PLF<br>3 | PLF<br>4 | PLF<br>5 | PLF<br>6 | PLF<br>8 | PLF<br>9 | PLF<br>10 | PLF<br>11 | PLF<br>12 | PLF<br>13 | PLF<br>17 | PLF<br>18 | PLF<br>19 | PLF<br>20 | PLF<br>21 |
|-------------------------------------------|----------|-----------|-----------|----------|----------|----------|----------|----------|----------|-----------|-----------|-----------|-----------|-----------|-----------|-----------|-----------|-----------|
| <i>Minimum</i>                            | 2.38     | 2         | 2         | 2        | 2        | 2        | 2        | 2        | 2        | 2         | 2         | 2         | 2         | 2         | 2         | 2         | 2         | 2         |
| <i>25th percentile</i>                    | 5.08     | 2         | 2         | 2        | 2        | 2        | 2        | 2        | 2        | 15.7      | 2         | 2         | 2         | 2         | 2         | 2.32      | 2         | 2         |
| <i>Median</i>                             | 6.59     | 2         | 2         | 2        | 2.0      | 2        | 3.2      | 2        | 2.6      | 20.9      | 2         | 2         | 2         | 2.95      | 2         | 3.99      | 2         | 2         |
| <i>Mean</i>                               |          |           |           |          | 7        |          | 3        |          | 5        | 1         |           |           |           |           |           |           |           |           |
|                                           | 7.12     | 2.8       | 4.1       | 9.0      | 3.9      | 4.7      | 4.4      | 3.1      | 9.5      | 18.5      | 2.56      | 2.4       | 5.8       | 6.34      | 4.27      | 4.7       | 5.77      | 5.19      |
|                                           |          | 7         | 2         | 4        | 6        |          | 1        | 2        | 5        | 4         |           |           |           |           |           |           |           |           |
| <i>75th percentile</i>                    | 8.02     | 2.3       | 4.0       | 5        | 4.3      | 3.6      | 5.9      | 2.8      | 11.      | 23.9      | 2         | 2         | 5.28      | 6.69      | 3.39      | 6.4       | 5.48      | 3.98      |
| <i>Maximum</i>                            |          | 6         | 1         |          | 9        | 8        | 9        | 6        | 64       | 5         |           |           |           |           |           |           |           |           |
|                                           | 18.6     | 17.       | 35.       | 75.      | 21.      | 48.      | 13.      | 21.      | 68.      | 33.3      | 14.9      | 12.5      | 64.3      | 69.3      | 60.8      | 14.1      | 57.3      | 47.8      |
|                                           |          | 62        | 52        | 18       | 71       | 02       | 75       | 45       | 62       | 6         | 3         | 4         | 9         | 6         |           | 3         | 3         | 2         |

|                                  |     |     |     |     |     |     |     |     |     |     |     |     |     |     |     |     |     |     |
|----------------------------------|-----|-----|-----|-----|-----|-----|-----|-----|-----|-----|-----|-----|-----|-----|-----|-----|-----|-----|
| <i>Total num. of data points</i> | 202 | 188 | 182 | 179 | 186 | 200 | 198 | 189 | 186 | 183 | 179 | 186 | 186 | 187 | 186 | 196 | 195 | 196 |
| <i>Missing values</i>            | 0   | 14  | 20  | 23  | 16  | 2   | 4   | 13  | 16  | 19  | 23  | 16  | 16  | 15  | 16  | 6   | 7   | 6   |

**Table S3.** Descriptive summary of PM<sub>2.5</sub>, PM<sub>10</sub>, NO<sub>2</sub> concentrations measured by the PLFs and supersite monitors at the Manchester Air Quality Supersite.

| PM <sub>2.5</sub><br>(µg/m <sub>3</sub> ) | Sup<br>ersite | PL<br>F 1 | PL<br>F 2 | PL<br>F 3 | PL<br>F 4 | PL<br>F 5 | PL<br>F 6 | PL<br>F 8 | PL<br>F 9 | PLF<br>10  | PLF<br>11  | PLF<br>12  | PLF<br>13  | PLF<br>17  | PLF<br>18  | PLF<br>19  | PLF<br>20  | PLF<br>21  |
|-------------------------------------------|---------------|-----------|-----------|-----------|-----------|-----------|-----------|-----------|-----------|------------|------------|------------|------------|------------|------------|------------|------------|------------|
| <i>Minimum</i>                            | 1.80          | 2         | 2         | 2         | 2         | 2         | 2         | 2         | 2         | 2          | 2          | 2          | 2          | 2          | 2          | 2          | 2          | 2          |
| <i>25th percentile</i>                    | 2.64          | 2         | 2         | 2         | 2         | 2         | 2         | 2         | 2         | 2          | 2          | 2          | 2          | 2          | 2          | 2          | 2          | 2          |
| <i>Median</i>                             | 3.03          | 2         | 2         | 2         | 2         | 3.3<br>5  | 2.5       | 2.0<br>1  | 2.3<br>9  | 2          | 2          | 2          | 2          | 3.92       | 2          | 2.26       | 2          | 2.58       |
| <i>Mean</i>                               | 3.05          | 2.8<br>1  | 4.4<br>4  | 4.4<br>8  | 3.9<br>2  | 7.7<br>2  | 3.2       | 5.9<br>2  | 5.0<br>9  | 2.54       | 2.15       | 2.12       | 2.23       | 7.44       | 4.38       | 3.76       | 4.5        | 5.23       |
| <i>75th percentile</i>                    | 3.46          | 2.2       | 3.7<br>6  | 2         | 3.6<br>2  | 9.5<br>2  | 3.8<br>4  | 6.2<br>8  | 6.2<br>3  | 2.25       | 2          | 2          | 2          | 8.22       | 3.72       | 4.79       | 4.24       | 5.49       |
| <i>Maximum</i>                            | 4.13          | 22.<br>39 | 37.<br>96 | 50.<br>5  | 28.<br>5  | 78.<br>91 | 12.<br>28 | 52.<br>7  | 27.<br>91 | 14.8<br>1  | 11.2<br>5  | 12.2<br>3  | 16.3       | 63.2<br>6  | 45.0<br>8  | 15.1<br>3  | 54.9<br>5  | 52.1<br>3  |
| <i>Total num. of data points</i>          | 220           | 205       | 207       | 207       | 206       | 211       | 211       | 196       | 205       | 205        | 206        | 204        | 207        | 206        | 207        | 212        | 212        | 210        |
| <i>Missing values</i>                     | 0             | 15        | 13        | 13        | 14        | 9         | 9         | 10        | 15        | 15         | 14         | 16         | 13         | 14         | 13         | 8          | 8          | 10         |
| PM <sub>10</sub><br>(µg/m <sup>3</sup> )  | Sup<br>ersite | PL<br>F 1 | PL<br>F 2 | PL<br>F 3 | PL<br>F 4 | PL<br>F 5 | PL<br>F 6 | PL<br>F 8 | PL<br>F 9 | PLF<br>10  | PLF<br>11  | PLF<br>12  | PLF<br>13  | PLF<br>17  | PLF<br>18  | PLF<br>19  | PLF<br>20  | PLF<br>21  |
| <i>Minimum</i>                            | 3.47          | 3         | 3         | 3         | 3         | 3         | 3         | 3         | 3         | 3          | 3          | 3          | 3          | 3          | 3          | 3          | 3          | 3          |
| <i>25th percentile</i>                    | 5.82          | 3         | 3         | 3         | 3         | 3         | 3         | 3         | 3         | 3          | 3          | 3          | 3          | 3          | 3          | 4.58       | 3          | 3          |
| <i>Median</i>                             | 6.66          | 3         | 3         | 3         | 3         | 4.6<br>1  | 3.8<br>4  | 3.1<br>8  | 3.6<br>9  | 3          | 3          | 3          | 3          | 5.84       | 3          | 17.0<br>8  | 3          | 3.58       |
| <i>Mean</i>                               | 6.48          | 15.<br>44 | 9.9<br>1  | 15.<br>11 | 11.<br>17 | 27.<br>59 | 10.<br>12 | 12.<br>8  | 18.<br>16 | 11.8<br>8  | 8.14       | 8.19       | 8.83       | 24.2<br>7  | 8.64       | 21.5<br>8  | 21.5<br>1  | 9.42       |
| <i>75th percentile</i>                    | 7.31          | 12.<br>74 | 4.8<br>9  | 3         | 4.6<br>7  | 12.<br>4  | 10.<br>74 | 9.4<br>1  | 13.<br>67 | 11.4<br>6  | 3          | 3.95       | 4.09       | 14.6<br>5  | 5.26       | 31         | 7.83       | 6.49       |
| <i>Maximum</i>                            | 8.8           | 157<br>.4 | 162<br>.0 | 420<br>.8 | 233<br>.7 | 429<br>.0 | 158<br>.3 | 169<br>.4 | 212<br>.5 | 127.<br>14 | 149.<br>78 | 142.<br>64 | 179.<br>46 | 387.<br>07 | 115.<br>41 | 141.<br>23 | 572.<br>93 | 302.<br>96 |





|        |      |      |      |      |      |      |      |      |      |      |      |      |      |      |      |      |      |   |  |
|--------|------|------|------|------|------|------|------|------|------|------|------|------|------|------|------|------|------|---|--|
| PLF 4  | 0.12 | 0.02 | 0.04 | 0.02 |      |      |      |      |      |      |      |      |      |      |      |      |      |   |  |
|        | 1    | 3    | 2    | 4    | —    |      |      |      |      |      |      |      |      |      |      |      |      |   |  |
| PLF 5  | 0.06 | -    | 0.00 | 0.01 | 0.09 |      |      |      |      |      |      |      |      |      |      |      |      |   |  |
|        | 0    | 0.00 | 8    | 7    | 5    | —    |      |      |      |      |      |      |      |      |      |      |      |   |  |
| PLF 6  | -    | 0.08 | -    | -    | -    | -    |      |      |      |      |      |      |      |      |      |      |      |   |  |
|        | 0.24 | 2    | 0.01 | 0.02 | 0.05 | 0.02 | —    |      |      |      |      |      |      |      |      |      |      |   |  |
| PLF 8  | 0.03 | 0.03 | -    | -    | -    | 0.04 | 0.01 |      |      |      |      |      |      |      |      |      |      |   |  |
|        | 0    | 6    | 0.01 | 0.01 | 0.00 | 3    | 9    | —    |      |      |      |      |      |      |      |      |      |   |  |
| PLF 9  | 0.18 | -    | 0.02 | 0.08 | 0.00 | -    | -    | -    |      |      |      |      |      |      |      |      |      |   |  |
|        | 5    | 0.03 | 8    | 6    | 4    | 0.03 | 0.09 | 0.00 | —    |      |      |      |      |      |      |      |      |   |  |
| PLF 10 | -    | -    | 0.02 | 0.04 | -    | 0.05 | 0.00 | -    | 0.04 |      |      |      |      |      |      |      |      |   |  |
|        | 0.03 | 0.01 | 0    | 1    | 0.03 | 1    | 6    | 0.02 | 0    | —    |      |      |      |      |      |      |      |   |  |
| PLF 11 | 0.25 | 0.04 | 0.01 | 0.08 | 0.03 | 0.02 | -    | -    | 0.02 | -    |      |      |      |      |      |      |      |   |  |
|        | 4    | 0    | 0    | 0    | 5    | 0    | 0.03 | 0.01 | 0    | 0.00 | —    |      |      |      |      |      |      |   |  |
| PLF 12 | 0.37 | 0.03 | -    | 0.09 | 0.03 | 0.05 | -    | 0.04 | 0.05 | 0.01 | 0.23 |      |      |      |      |      |      |   |  |
|        | 2    | 3    | 0.01 | 4    | 0    | 0    | 0.03 | 7    | 8    | 4    | 2    | —    |      |      |      |      |      |   |  |
| PLF 13 | -    | -    | 0.02 | -    | 0.01 | 0.01 | 0.02 | -    | -    | 0.45 | 0.00 | -    |      |      |      |      |      |   |  |
|        | 0.06 | 0.01 | 7    | 0.02 | 4    | 2    | 5    | 0.01 | 0.02 | 1    | 9    | 0.00 | —    |      |      |      |      |   |  |
| PLF 17 | 0.16 | 0.04 | -    | 0.00 | 0.09 | 0.01 | -    | 0.09 | 0.03 | 0.03 | 0.07 | 0.08 | 0.01 |      |      |      |      |   |  |
|        | 3    | 3    | 0.00 | 6    | 0    | 1    | 0.02 | 7    | 0    | 2    | 9    | 1    | 2    | —    |      |      |      |   |  |
| PLF 18 | 0.08 | 0.02 | -    | 0.01 | -    | -    | -    | -    | 0.01 | 0.03 | -    | 0.00 | 0.00 | 0.02 |      |      |      |   |  |
|        | 3    | 2    | 0.03 | 2    | 0.01 | 0.02 | 0.05 | 0.03 | 2    | 0    | 0.00 | 1    | 3    | 4    | —    |      |      |   |  |
| PLF 19 | 0.58 | -    | -    | 0.09 | 0.12 | 0.05 | -    | 0.02 | 0.10 | -    | 0.21 | 0.30 | -    | 0.13 | 0.02 |      |      |   |  |
|        | 3    | 0.01 | 0.03 | 1    | 0    | 2    | 0.11 | 0    | 4    | 0.00 | 0    | 3    | 0.04 | 1    | 6    | —    |      |   |  |
| PLF 20 | 0.00 | -    | -    | -    | -    | 0.00 | -    | -    | 0.05 | 0.06 | -    | -    | 0.01 | 0.07 | 0.04 | 0.01 |      |   |  |
|        | 9    | 0.00 | 0.00 | 0.03 | 0.00 | 3    | 0.05 | 0.03 | 6    | 3    | 0.04 | 0.01 | 0    | 1    | 6    | 2    | —    |   |  |
| PLF 21 | 0.03 | -    | -    | 0.03 | 0.03 | -    | -    | 0.11 | 0.00 | 0.00 | -    | 0.05 | -    | 0.00 | 0.00 | 0.02 | -    |   |  |
|        | 8    | 0.02 | 0.05 | 9    | 6    | 0.06 | 0.01 | 6    | 1    | 6    | 0.01 | 7    | 0.03 | 9    | 3    | 6    | 0.08 | — |  |
|        |      | 2    | 2    |      |      | 5    | 1    |      |      |      | 1    | 6    | 6    | 9    | 3    | 6    | 5    |   |  |

Note: POPS and PLF; the measurements carried out over 3 weeks period.

**Table S5.** Correlation coefficient of PM<sub>10</sub> concentrations for all PLF tools versus Arisense device measurements at the indoor monitoring location.

|          | Arisense | PLF 1 | PLF 2 | PLF 3 | PLF 4 | PLF 5 | PLF 6 | PLF 8 | PLF 9 | PLF 10 | PLF 11 | PLF 12 | PLF 13 | PLF 17 | PLF 18 | PLF 19 | PLF 20 | PLF 21 |
|----------|----------|-------|-------|-------|-------|-------|-------|-------|-------|--------|--------|--------|--------|--------|--------|--------|--------|--------|
| Arisense | —        |       |       |       |       |       |       |       |       |        |        |        |        |        |        |        |        |        |
| PLF 1    | 0.130    | —     |       |       |       |       |       |       |       |        |        |        |        |        |        |        |        |        |
| PLF 2    | -0.054   | 0.024 | —     |       |       |       |       |       |       |        |        |        |        |        |        |        |        |        |
| PLF 3    | -0.008   | 0.002 | 0.021 | —     |       |       |       |       |       |        |        |        |        |        |        |        |        |        |
| PLF 4    | -0.035   | 0.009 | 0.063 | 0.012 | —     |       |       |       |       |        |        |        |        |        |        |        |        |        |
| PLF 5    | -0.061   | 0.029 | 0.022 | 0.020 | 0.033 | —     |       |       |       |        |        |        |        |        |        |        |        |        |
| PLF 6    | 0.118    | 0.078 | 0.008 | 0.028 | 0.006 | 0.004 | —     |       |       |        |        |        |        |        |        |        |        |        |
| PLF 8    | 0.084    | 0.049 | 0.007 | 0.021 | 0.016 | 0.009 | 0.050 | —     |       |        |        |        |        |        |        |        |        |        |
| PLF 9    | 0.032    | 0.006 | 0.016 | 0.091 | 0.009 | 0.023 | 0.034 | 0.007 | —     |        |        |        |        |        |        |        |        |        |
| PLF 10   | 0.132    | 0.022 | 0.028 | 0.002 | 0.009 | 0.018 | 0.008 | 0.000 | 0.046 | —      |        |        |        |        |        |        |        |        |
| PLF 11   | 0.168    | 0.025 | 0.014 | 0.022 | 0.005 | 0.037 | 0.044 | 0.000 | 0.001 | 0.050  | —      |        |        |        |        |        |        |        |
| PLF 12   | 0.142    | 0.010 | 0.033 | 0.034 | 0.004 | 0.031 | 0.054 | 0.018 | 0.016 | 0.081  | 0.042  | —      |        |        |        |        |        |        |
| PLF 13   | 0.123    | 0.011 | 0.010 | 0.035 | 0.007 | 0.009 | 0.035 | 0.023 | 0.006 | 0.099  | 0.054  | 0.013  | —      |        |        |        |        |        |

|     |       |      |      |      |      |      |      |      |      |      |      |      |      |      |      |      |      |
|-----|-------|------|------|------|------|------|------|------|------|------|------|------|------|------|------|------|------|
| PLF |       |      | -    | -    |      | -    | 0.01 | 0.04 | -    | 0.02 | 0.00 | -    | -    |      |      |      |      |
| 17  |       | 0.02 | 0.00 | 0.03 | 0.02 | 0.02 | 0    | 3    | 0.02 | 0.02 | 3    | 0.01 | 0.01 | -    |      |      |      |
|     | 0.009 | 6    | 7    | 8    | 5    | 5    |      |      | 6    | 5    |      | 2    | 7    |      |      |      |      |
| PLF |       |      | -    | -    | -    | -    | -    | -    | 0.03 | 0.02 | -    | 0.01 | 0.00 | 0.02 |      |      |      |
| 18  |       | 0.04 | 0.02 | 0.00 | 0.03 | 0.01 | 0.03 | 0.02 | 8    | 7    | 0.03 | 0    | 4    | 7    | -    |      |      |
|     | 0.039 | 6    | 5    | 6    | 0    | 9    | 4    | 5    |      |      | 6    |      |      |      |      |      |      |
| PLF |       |      | -    | -    |      | -    | 0.06 | 0.04 | 0.01 | 0.09 | 0.06 | 0.11 | 0.03 | -    | -    |      |      |
| 19  |       | 0.00 | 0.02 | 0.01 | 0.06 | 0.01 |      |      | 3    | 7    | 9    | 1    | 3    | 0.02 | 0.02 | -    |      |
|     | 0.294 | 1    | 4    | 0    | 3    | 4    | 1    | 6    |      |      |      |      |      | 3    | 2    |      |      |
| PLF |       |      |      | -    | -    | 0.00 | -    | -    | 0.01 | 0.07 | -    | 0.00 | 0.01 | 0.03 | 0.03 | 0.01 |      |
| 20  |       | 0.01 | 0.01 | 0.02 | 0.01 | 8    | 0.00 | 0.01 | 5    | 4    | 0.00 | 8    | 2    | 8    | 8    | 4    | -    |
|     | 0.115 | 1    | 6    | 3    | 7    |      | 6    | 4    |      |      | 5    |      |      |      |      |      |      |
| PLF |       | -    | -    | -    |      | -    | -    | 0.02 | 0.01 | 0.01 | -    | 0.04 | -    | 0.02 | -    | -    | -    |
| 21  |       | 0.04 | 0.01 | 0.01 | 0.02 | 0.04 | 0.00 |      | 2    | 3    | 5    | 0.03 | 5    | 0.02 | 8    | 0.02 | 0.00 |
|     | 0.005 | 9    | 7    | 5    | 2    | 8    | 8    |      |      |      | 8    |      | 7    |      | 0    | 6    | 3    |

Note: Arisense and PLF; the measurements carried out over 3 weeks period.

**Table S6.** Correlation coefficient of NO<sub>2</sub> for all PLF tools versus Arisense device measurements at the indoor monitoring location.

|          | Arisens | PLF<br>1 | PLF<br>2 | PLF<br>3 | PLF<br>4 | PLF<br>5 | PLF<br>6 | PLF<br>8 | PLF<br>9 | PLF<br>10 | PLF<br>11 | PLF<br>12 | PLF<br>13 | PLF<br>17 | PLF<br>18 | PLF<br>19 | PLF<br>20 | PLF<br>21 |
|----------|---------|----------|----------|----------|----------|----------|----------|----------|----------|-----------|-----------|-----------|-----------|-----------|-----------|-----------|-----------|-----------|
| Arisense | –       |          |          |          |          |          |          |          |          |           |           |           |           |           |           |           |           |           |
| PLF 1    | -0.104  | –        |          |          |          |          |          |          |          |           |           |           |           |           |           |           |           |           |
| PLF 2    | 0.040   | 0.607    | –        |          |          |          |          |          |          |           |           |           |           |           |           |           |           |           |
| PLF 3    | -0.060  | 0.401    | 0.435    | –        |          |          |          |          |          |           |           |           |           |           |           |           |           |           |
| PLF 4    | 0.027   | 0.260    | 0.241    | 0.051    | –        |          |          |          |          |           |           |           |           |           |           |           |           |           |
| PLF 5    | 0.047   | -0.113   | -0.027   | -0.005   | 0.316    | –        |          |          |          |           |           |           |           |           |           |           |           |           |
| PLF 6    | 0.130   | 0.327    | 0.537    | 0.420    | 0.071    | 0.166    | –        |          |          |           |           |           |           |           |           |           |           |           |
| PLF 8    | 0.115   | 0.413    | 0.628    | 0.483    | 0.050    | 0.026    | 0.648    | –        |          |           |           |           |           |           |           |           |           |           |
| PLF 9    | -0.196  | 0.047    | 0.119    | 0.313    | 0.150    | 0.334    | 0.183    | 0.262    | –        |           |           |           |           |           |           |           |           |           |
| PLF 10   | 0.035   | 0.350    | 0.335    | 0.529    | 0.080    | 0.097    | 0.454    | 0.407    | 0.264    | –         |           |           |           |           |           |           |           |           |
| PLF 11   | -0.025  | 0.261    | 0.375    | 0.438    | 0.134    | 0.035    | 0.272    | 0.203    | 0.141    | 0.453     | –         |           |           |           |           |           |           |           |
| PLF 12   | -0.133  | 0.202    | 0.245    | 0.386    | 0.260    | 0.223    | 0.307    | 0.313    | 0.599    | 0.420     | 0.380     | –         |           |           |           |           |           |           |
| PLF 13   | 0.085   | 0.203    | 0.464    | 0.411    | 0.056    | 0.093    | 0.527    | 0.436    | 0.162    | 0.617     | 0.596     | 0.255     | –         |           |           |           |           |           |
| PLF 17   | 0.037   | 0.203    | 0.289    | 0.344    | 0.327    | 0.105    | 0.330    | 0.281    | 0.182    | 0.373     | 0.420     | 0.358     | 0.407     | –         |           |           |           |           |
| PLF 18   | 0.222   | 0.348    | 0.597    | 0.333    | 0.107    | 0.073    | 0.679    | 0.654    | 0.046    | 0.486     | 0.336     | 0.278     | 0.594     | 0.451     | –         |           |           |           |
| PLF 19   | -0.008  | 0.305    | 0.296    | 0.476    | 0.130    | 0.076    | 0.409    | 0.283    | 0.188    | 0.581     | 0.632     | 0.296     | 0.573     | 0.577     | 0.401     | –         |           |           |
| PLF 20   | 0.019   | 0.406    | 0.414    | 0.528    | 0.145    | 0.072    | 0.579    | 0.451    | 0.175    | 0.722     | 0.522     | 0.471     | 0.573     | 0.491     | 0.627     | 0.619     | –         |           |
| PLF 21   | 0.088   | 0.485    | 0.548    | 0.446    | 0.085    | 0.068    | 0.685    | 0.666    | 0.193    | 0.612     | 0.399     | 0.430     | 0.516     | 0.458     | 0.731     | 0.527     | 0.777     | –         |

Note: Supersite monitor and PLF; the measurements carried out over 3 weeks period.

**Table S7.** Correlation coefficient of PM<sub>2.5</sub> concentrations between PLF tools and POPS device at the road site.

|                  | POP<br>S          | PLF<br>1       | PLF<br>2       | PLF<br>3       | PLF<br>4       | PLF<br>5       | PLF<br>6       | PLF<br>8       | PLF<br>9       | PLF<br>10      | PLF<br>11      | PLF<br>12      | PLF<br>13 | PLF<br>17 | PLF<br>18 | PLF<br>19 | PLF<br>20 | PL<br>F<br>21 |
|------------------|-------------------|----------------|----------------|----------------|----------------|----------------|----------------|----------------|----------------|----------------|----------------|----------------|-----------|-----------|-----------|-----------|-----------|---------------|
| POPS             | —                 |                |                |                |                |                |                |                |                |                |                |                |           |           |           |           |           |               |
| PLF 1            | 0.16<br>6         | —              |                |                |                |                |                |                |                |                |                |                |           |           |           |           |           |               |
| <b>PLF<br/>2</b> | <b>0.43<br/>2</b> | 0.02<br>8      | —              |                |                |                |                |                |                |                |                |                |           |           |           |           |           |               |
| PLF 3            | -<br>0.29<br>9    | -<br>0.12<br>6 | 0.00<br>7      | —              |                |                |                |                |                |                |                |                |           |           |           |           |           |               |
| PLF 4            | -<br>0.27<br>1    | -<br>0.11<br>8 | -<br>0.08<br>1 | 0.10<br>1      | —              |                |                |                |                |                |                |                |           |           |           |           |           |               |
| PLF 5            | -<br>0.08<br>1    | -<br>0.05<br>0 | -<br>0.11<br>4 | -<br>0.04<br>1 | -<br>0.11<br>2 | —              |                |                |                |                |                |                |           |           |           |           |           |               |
| PLF 6            | 0.15<br>7         | -<br>0.04<br>1 | 0.02<br>4      | -<br>0.15<br>4 | -<br>0.32<br>4 | 0.02<br>1      | —              |                |                |                |                |                |           |           |           |           |           |               |
| PLF 8            | -<br>0.03<br>4    | 0.01<br>2      | -<br>0.04<br>7 | 0.14<br>0      | -<br>0.11<br>6 | -<br>0.05<br>6 | 0.13<br>0      | —              |                |                |                |                |           |           |           |           |           |               |
| PLF 9            | -<br>0.47<br>8    | -<br>0.16<br>5 | -<br>0.08<br>4 | 0.43<br>6      | 0.30<br>1      | 0.40<br>6      | -<br>0.24<br>9 | -<br>0.03<br>3 | —              |                |                |                |           |           |           |           |           |               |
| PLF<br>10        | -<br>0.43<br>8    | -<br>0.02<br>4 | -<br>0.34<br>6 | 0.14<br>2      | 0.10<br>8      | 0.14<br>0      | -<br>0.09<br>6 | -<br>0.21<br>7 | -<br>0.28<br>6 | —              |                |                |           |           |           |           |           |               |
| PLF<br>11        | 0.16<br>7         | -<br>0.07<br>4 | 0.11<br>6      | -<br>0.11<br>9 | -<br>0.17<br>6 | -<br>0.05<br>3 | 0.33<br>6      | -<br>0.03<br>5 | -<br>0.04<br>8 | -<br>0.02<br>1 | —              |                |           |           |           |           |           |               |
| PLF<br>12        | 0.31<br>1         | 0.21<br>0      | 0.17<br>0      | -<br>0.11<br>5 | -<br>0.02<br>5 | -<br>0.06<br>9 | -<br>0.03<br>8 | -<br>0.12<br>0 | -<br>0.17<br>0 | -<br>0.33<br>6 | -<br>0.06<br>6 | —              |           |           |           |           |           |               |
| PLF<br>13        | -<br>0.01<br>2    | 0.23<br>6      | -<br>0.08<br>4 | -<br>0.14<br>5 | -<br>0.15<br>6 | -<br>0.04<br>3 | 0.35<br>9      | 0.17<br>7      | -<br>0.21<br>4 | 0.23<br>5      | 0.02<br>0      | -<br>0.10<br>7 | —         |           |           |           |           |               |

|        |                |                |                |                |                |                |                |           |                |           |                |                |                |                |                |                |           |   |
|--------|----------------|----------------|----------------|----------------|----------------|----------------|----------------|-----------|----------------|-----------|----------------|----------------|----------------|----------------|----------------|----------------|-----------|---|
| PLF 17 | 0.56<br>2      | 0.03<br>4      | 0.11<br>2      | -<br>1         | -<br>6         | 0.04<br>9      | 0.20<br>1      | -<br>1    | -<br>8         | -<br>9    | 0.08<br>5      | 0.03<br>3      | -<br>0.02<br>8 | -              |                |                |           |   |
| PLF 18 | -<br>0.08<br>4 | 0.00<br>0      | -<br>0.11<br>4 | -<br>0.04<br>3 | -<br>0.09<br>3 | -<br>0.06<br>0 | 0.17<br>7      | 0.13<br>0 | -<br>0.12<br>3 | 0.17<br>7 | -<br>0.04<br>3 | -<br>0.09<br>5 | 0.37<br>1      | -<br>0.06<br>6 | -              |                |           |   |
| PLF 19 | 0.14<br>4      | -<br>0.02<br>1 | 0.10<br>5      | 0.07<br>1      | -<br>0.13<br>1 | -<br>0.03<br>3 | 0.08<br>6      | 0.01<br>3 | 0.13<br>8      | 0.16<br>9 | 0.18<br>1      | 0.21<br>9      | 0.25<br>5      | 0.07<br>9      | 0.21<br>4      | -              |           |   |
| PLF 20 | 0.01<br>1      | -<br>0.04<br>0 | -<br>0.02<br>8 | -<br>0.14<br>3 | -<br>0.18<br>2 | -<br>0.02<br>6 | -<br>0.00<br>4 | 0.29<br>3 | -<br>0.18<br>4 | 0.16<br>8 | 0.07<br>2      | -<br>0.10<br>1 | 0.07<br>5      | -<br>0.05<br>8 | 0.12<br>0      | -<br>0.09<br>5 | -         |   |
| PLF 21 | -<br>0.28<br>2 | -<br>0.11<br>3 | 0.01<br>4      | 0.73<br>2      | 0.10<br>7      | -<br>0.01<br>0 | -<br>0.25<br>2 | 0.22<br>2 | 0.51<br>1      | 0.22<br>8 | -<br>0.07<br>5 | -<br>0.13<br>8 | -<br>0.09<br>1 | -<br>0.15<br>8 | -<br>0.01<br>4 | -<br>0.01<br>2 | 0.02<br>7 | - |

Note: POPS and PLF; the measurements were taken from 11:26 AM to 3:41 PM on the 19<sup>th</sup> of November 2020

**Table S8.** Correlation coefficient of PM<sub>2.5</sub> and PM<sub>10</sub> concentrations for all PLF tools versus Supersite monitor measurements at the Manchester Air Quality Supersite (*correlation coefficient for PM<sub>2.5</sub>, lower-left; correlation coefficient for PM<sub>10</sub>, upper-right*)

|           | Supersite | PLF 1          | PLF 2          | PLF 3          | PLF 4          | PLF 5          | PLF 6          | PLF 8          | PLF 9          | PLF 10         | PLF 11         | PLF 12    | PLF 13         | PLF 17         | PLF 18         | PLF 19         | PLF 20         | PLF 21         |
|-----------|-----------|----------------|----------------|----------------|----------------|----------------|----------------|----------------|----------------|----------------|----------------|-----------|----------------|----------------|----------------|----------------|----------------|----------------|
| Supersite | -         | 0.09<br>2      | 0.16<br>5      | 0.25<br>2      | -<br>0.11<br>8 | 0.23<br>6      | -<br>0.15<br>9 | -<br>0.14<br>1 | 0.33<br>4      | -<br>0.18<br>1 | -<br>0.16<br>8 | 0.08<br>2 | -<br>0.28<br>8 | 0.09<br>3      | 0.06<br>1      | -<br>0.14<br>1 | 0.01<br>3      | 0.04<br>7      |
| PLF 1     | 0.143     | -              | 0.00<br>0      | 0.32<br>4      | 0.00<br>9      | -<br>0.04<br>0 | -<br>0.06<br>8 | -<br>0.11<br>8 | 0.14<br>6      | -<br>0.02<br>7 | -<br>0.02<br>7 | 0.16<br>2 | 0.03<br>6      | -<br>0.02<br>3 | -<br>0.10<br>3 | 0.02<br>3      | -<br>0.00<br>1 | 0.12<br>6      |
| PLF 2     | 0.119     | 0.02<br>2      | -              | 0.15<br>1      | -<br>0.06<br>4 | -<br>0.12<br>7 | -<br>0.05<br>2 | -<br>0.03<br>4 | 0.01<br>7      | 0.05<br>9      | -<br>0.07<br>3 | 0.23<br>7 | -<br>0.07<br>6 | -<br>0.15<br>5 | -<br>0.08<br>7 | -<br>0.01<br>4 | 0.08<br>7      | 0.01<br>4      |
| PLF 3     | 0.166     | 0.14<br>7      | 0.47<br>5      | -              | -<br>0.02<br>6 | 0.09<br>8      | 0.06<br>3      | -<br>0.03<br>8 | -<br>0.04<br>1 | 0.00<br>6      | -<br>0.05<br>5 | 0.10<br>0 | -<br>0.04<br>9 | -<br>0.09<br>4 | -<br>0.05<br>5 | 0.04<br>9      | 0.01<br>8      | -<br>0.01<br>9 |
| PLF 4     | -0.197    | -<br>0.07<br>9 | -<br>0.08<br>0 | -<br>0.01<br>5 | -              | -<br>0.09<br>2 | 0.02<br>0      | 0.00<br>9      | -<br>0.09<br>6 | -<br>0.07<br>4 | -<br>0.03<br>0 | 0.03<br>7 | -<br>0.07<br>5 | 0.05<br>4      | -<br>0.04<br>5 | 0.09<br>0      | 0.05<br>1      | -<br>0.02<br>8 |

|        |        |      |      |      |      |      |      |      |      |      |      |      |      |      |      |      |      |      |
|--------|--------|------|------|------|------|------|------|------|------|------|------|------|------|------|------|------|------|------|
| PLF 5  | -      | -    | 0.11 | -    |      |      |      |      |      |      |      |      |      |      |      |      |      |      |
|        | 0.094  | 0.00 | 0.07 | 0.10 | -    | 0.02 | 0.09 | 0.01 | -    | 0.07 | 0.09 | 0.05 | 0.01 | 0.42 | 0.20 | -    | -    |      |
|        |        | 6    | 7    | 4    | 8    | 8    | 5    | 4    | 0.10 | 0    | 1    | 0    | 0    | 0    | 9    | 0.03 | 0.03 |      |
| PLF 6  | -      | -    | -    | 0.17 | 0.12 |      |      |      |      |      |      |      |      |      |      |      |      |      |
|        | -0.243 | 0.09 | 0.06 | 0.00 | 4    | 8    | -    | 0.04 | 0.07 | 0.28 | 0.02 | 0.06 | 0.06 | 0.07 | 0.16 | 0.02 | 0.05 | 0.01 |
|        |        | 7    | 8    | 5    | 4    | 8    |      | 0    | 8    | 5    | 0    | 9    | 0    | 5    | 8    | 1    | 9    | 5    |
| PLF 8  | -      | -    | -    | 0.06 | 0.10 | 0.05 |      |      |      |      |      |      |      |      |      |      |      |      |
|        | -0.131 | 0.07 | 0.05 | 0.04 | 3    | 1    | 2    | -    | 0.00 | 0.10 | 0.59 | 0.06 | 0.14 | -    | 0.02 | 0.04 | -    | -    |
|        |        | 4    | 5    | 7    | 3    | 1    | 2    |      | 3    | 5    | 1    | 8    | 0    | 0.07 | 6    | 3    | 0.01 | 0.03 |
| PLF 9  | -      | -    | -    | -    | 0.00 | -    |      |      |      |      |      |      |      |      |      |      |      |      |
|        | 0.187  | 0.02 | 0.02 | 0.10 | 0.16 | 0.11 | 0.08 | -    | 0.06 | 0.03 | 0.05 | 0.01 | 0.05 | -    | -    | -    | -    | -    |
|        |        | 5    | 2    | 5    | 0    | 9    | 4    |      | 3    | 0    | 8    | 1    | 1    | 7    | 0    | 3    | 5    |      |
| PLF 10 | -      | 0.09 | 0.07 | -    | -    | 0.15 | -    | -    | -    | -    | -    | -    | -    | -    | -    | -    | -    | -    |
|        | -0.204 | 0.04 | 4    | 3    | 0.02 | 0.02 | 4    | 0.12 | 0.11 | -    | 0.10 | 0.13 | 0.06 | 0.19 | 0.03 | 0.19 | 0.12 | 0.11 |
|        |        | 4    |      |      | 2    | 3    | 8    | 6    |      | 7    | 4    | 7    | 8    | 9    | 6    | 7    | 7    |      |
| PLF 11 | -      | -    | -    | 0.17 | -    | 0.09 | 0.22 | -    | -    | -    | -    | -    | -    | -    | -    | -    | -    | -    |
|        | -0.140 | 0.07 | 0.06 | 0.02 | 5    | 0.00 | 5    | 9    | 0.13 | 0.06 | -    | 0.07 | 0.10 | 0.09 | 0.08 | 0.07 | 0.04 | 0.04 |
|        |        | 3    | 8    | 8    | 5    | 2    | 5    | 9    | 0    | 6    |      | 2    | 8    | 9    | 8    | 8    | 1    | 6    |
| PLF 12 | -      | 0.26 | -    | -    | -    | -    | -    | 0.07 | 0.27 | -    | -    | -    | -    | -    | -    | -    | -    | -    |
|        | -0.023 | 0.12 | 0.03 | 0.04 | 0.06 | 0.07 | 0.07 | 2    | 9    | 0.03 | 0.02 | -    | 0.08 | 0.16 | 0.13 | 0.00 | 0.03 | 0.05 |
|        |        | 7    | 0    | 4    | 5    | 2    | 8    |      |      | 8    | 0    |      | 0    | 3    | 2    | 6    | 2    | 2    |
| PLF 13 | -      | -    | -    | -    | -    | -    | -    | -    | -    | -    | -    | -    | -    | -    | -    | -    | -    | -    |
|        | -0.210 | 0.00 | 0.07 | 0.04 | 0.06 | 0.07 | 0.10 | 0.07 | 0.07 | 0.18 | 0.02 | 0.01 | -    | 0.10 | 0.01 | 0.08 | 0.05 | 0.04 |
|        |        | 6    | 1    | 7    | 0    | 5    | 0    | 1    | 3    | 5    | 7    | 6    |      | 4    | 9    | 8    | 0    | 1    |
| PLF 17 | -      | -    | -    | 0.10 | -    | 0.17 | 0.05 | 0.07 | -    | -    | -    | -    | -    | -    | -    | -    | -    | -    |
|        | -0.085 | 0.12 | 0.08 | 0.07 | 0.02 | 0.17 | 0.05 | 0.07 | 0.09 | 0.03 | 0.06 | 0.02 | -    | 0.09 | 0.11 | 0.41 | 0.38 |      |
|        |        | 3    | 6    | 1    | 4    | 3    | 3    | 7    | 6    | 6    | 1    | 4    |      | 5    | 5    | 6    | 7    |      |
| PLF 18 | -      | -    | -    | -    | 0.14 | 0.13 | -    | -    | 0.03 | 0.00 | 0.27 | -    | 0.03 | -    | 0.23 | -    | -    | -    |
|        | -0.082 | 0.05 | 0.06 | 0.05 | 0.02 | 8    | 1    | 0.03 | 0.07 | 2    | 1    | 7    | 0.01 | 1    | -    | 0    | 0.09 | 0.02 |
|        |        | 2    | 1    | 0    | 9    | 8    | 1    | 0    |      | 2    |      |      | 3    | 1    |      | 3    | 9    |      |
| PLF 19 | -      | 0.04 | 0.03 | 0.32 | 0.10 | 0.27 | 0.06 | -    | 0.17 | 0.24 | 0.05 | -    | 0.18 | 0.18 | -    | 0.10 | 0.07 |      |
|        | -0.355 | 0.09 | 3    | 9    | 2    | 0    | 9    | 9    | 0.28 | 0    | 4    | 9    | 0.02 | 7    | 4    | -    | 9    | 0    |
|        |        | 6    |      |      |      |      |      |      | 1    |      |      |      | 4    |      |      |      |      |      |
| PLF 20 | -      | -    | 0.02 | 0.10 | -    | 0.09 | -    | 0.02 | -    | -    | -    | -    | 0.70 | -    | 0.12 | -    | -    | -    |
|        | -0.140 | 0.06 | 0.10 | 1    | 4    | 0.06 | 0.04 | 0.02 | 0.06 | 0.00 | 0.04 | 0.05 | 9    | 0.06 | 9    | -    | 0.00 |      |
|        |        | 6    | 2    |      | 3    | 2    | 4    | 6    | 2    | 7    | 8    | 1    | 9    | 3    |      |      | 9    |      |
| PLF 21 | -      | 0.18 | 0.27 | -    | 0.02 | -    | -    | 0.23 | 0.03 | -    | -    | -    | 0.17 | 0.05 | 0.00 | 0.16 | -    |      |
|        | 0.153  | 0.08 | 3    | 7    | 0.02 | 0.05 | 0.02 | 0    | 1    | 0.01 | 0.04 | 0.06 | 8    | 8    | 9    | 4    | -    |      |
|        |        | 2    |      | 6    | 6    | 5    | 6    |      |      | 4    | 5    | 2    |      |      |      |      |      |      |

Note: Supersite monitor and PLF; the measurements were taken from 12:10 to 3:49 PM on November 19,2020

**Table S9.** Correlation coefficient of NO<sub>2</sub> concentrations for all PLF tools versus Supersite Monitor at the Manchester Air Quality Supersite.

|           | Supersite | PLF<br>1 | PLF<br>2 | PLF<br>3 | PLF<br>4 | PLF<br>5 | PLF<br>6 | PLF<br>8 | PLF<br>9 | PLF<br>10 | PLF<br>11 | PLF<br>12 | PLF<br>13 | PLF<br>17 | PLF<br>18 | PLF<br>19 | PLF<br>20 |
|-----------|-----------|----------|----------|----------|----------|----------|----------|----------|----------|-----------|-----------|-----------|-----------|-----------|-----------|-----------|-----------|
| Supersite | –         |          |          |          |          |          |          |          |          |           |           |           |           |           |           |           |           |
| PLF 1     | -0.157    | –        |          |          |          |          |          |          |          |           |           |           |           |           |           |           |           |
| PLF 2     | -0.105    | 0.554    | –        |          |          |          |          |          |          |           |           |           |           |           |           |           |           |
| PLF 3     | -0.244    | 0.826    | 0.265    | –        |          |          |          |          |          |           |           |           |           |           |           |           |           |
| PLF 4     | -0.577    | 0.563    | 0.538    | 0.642    | –        |          |          |          |          |           |           |           |           |           |           |           |           |
| PLF 5     | -0.455    | 0.515    | 0.616    | 0.476    | 0.797    | –        |          |          |          |           |           |           |           |           |           |           |           |
| PLF 6     | -0.189    | 0.843    | 0.359    | 0.716    | 0.477    | 0.377    | –        |          |          |           |           |           |           |           |           |           |           |
| PLF 8     | -0.364    | 0.242    | 0.053    | 0.524    | 0.632    | 0.304    | 0.351    | –        |          |           |           |           |           |           |           |           |           |
| PLF 9     | -0.496    | 0.627    | 0.725    | 0.421    | 0.738    | 0.750    | 0.484    | 0.200    | –        |           |           |           |           |           |           |           |           |
| PLF 10    | -0.176    | 0.939    | 0.410    | 0.918    | 0.598    | 0.487    | 0.797    | 0.346    | 0.508    | –         |           |           |           |           |           |           |           |
| PLF 11    | -0.148    | 0.884    | 0.768    | 0.707    | 0.596    | 0.576    | 0.745    | 0.212    | 0.657    | 0.813     | –         |           |           |           |           |           |           |
| PLF 12    | -0.549    | 0.516    | 0.595    | 0.433    | 0.762    | 0.527    | 0.491    | 0.489    | 0.746    | 0.424     | 0.611     | –         |           |           |           |           |           |
| PLF 13    | -0.117    | 0.777    | 0.659    | 0.589    | 0.525    | 0.458    | 0.765    | 0.239    | 0.521    | 0.721     | 0.869     | 0.557     | –         |           |           |           |           |
| PLF 17    | -0.286    | 0.576    | 0.034    | 0.820    | 0.554    | 0.426    | 0.466    | 0.481    | 0.335    | 0.682     | 0.427     | 0.347     | 0.179     | –         |           |           |           |
| PLF 18    | -0.145    | 0.909    | 0.329    | 0.793    | 0.416    | 0.345    | 0.872    | 0.277    | 0.449    | 0.879     | 0.748     | 0.441     | 0.651     | 0.582     | –         |           |           |
| PLF 19    | -0.181    | 0.763    | 0.742    | 0.619    | 0.696    | 0.637    | 0.713    | 0.402    | 0.614    | 0.721     | 0.849     | 0.638     | 0.895     | 0.261     | 0.656     | –         |           |
| PLF 20    | -0.269    | 0.870    | 0.687    | 0.766    | 0.720    | 0.648    | 0.809    | 0.432    | 0.673    | 0.836     | 0.866     | 0.608     | 0.792     | 0.462     | 0.788     | 0.862     | –         |

Note: Supersite monitor and PLF; the measurements were taken from 12:10 to 3:49 PM on November 19,2020
